# Supplementary material for: The influence of intramolecular sulfur–lone pair interactions on small-molecule drug design and receptor binding
Source: Royal Society of Chemistry journal article supplement (doi:10.1039/c6ob00254d), 2016-01-01
Supplement: c6ob00254d2.pdf [file c6ob00254d2.pdf]

Supporting Information for:

## **The Influence of Intramolecular Sulfur–Lone Pair Interactions on Small-Molecule Drug Design and Receptor Binding**

Brandi M. Hudson, Elizabeth Nguyen, Dean J. Tantillo\*

*Department of Chemistry, University of California, Davis CA 95618*

|                                                              |     |
|--------------------------------------------------------------|-----|
| <b>Table of Contents</b> .....                               | S1  |
| <b>I. FRED Receptor specifications</b> .....                 | S2  |
| <b>II. Calculated coordinates and energies</b> .....         | S2  |
| i. Implicit solvation and MP2 calculations of <b>1</b> ..... | S2  |
| ii. M06-2X/6-31+G(d,p) calculations of ligands.....          | S2  |
| <b>III. Full Gaussian reference</b> .....                    | S16 |

## I. FRED Receptor specifications

**Table S1:** FRED Receptor specifications for each active site.

| PDB ID | Box Volume (Å <sup>3</sup> ) | Inner Contour (Å <sup>3</sup> ) | Outer Contour (Å <sup>3</sup> ) | Constraints     |
|--------|------------------------------|---------------------------------|---------------------------------|-----------------|
| 3H0E   | 5714                         | 62                              | 1809                            | ARG207, HIS121B |
| 1HSK   | 11937                        | 83                              | 3900                            | None            |
| 4MLH   | 9612                         | 62                              | 2060                            | ARG63           |
| 3UW4   | 5040                         | 60                              | 1859                            | None            |

## II. Calculated coordinates and energies

### i. Implicit solvation and MP2 calculations of **1**

**Table S1.** Electronic energy differences<sup>a</sup> of conformations of **1** using various model chemistries, basis sets, and solvation models.

| M06-2X/6-31+G(d,p) <sup>b</sup> | SMD(H <sub>2</sub> O)<br>M06-2X/6-31+G(d,p) | CPCM(H <sub>2</sub> O)<br>M06-2X/6-31+G(d,p) | MP2/6-31+G(d,p) | MP2/cc-PVTZ |
|---------------------------------|---------------------------------------------|----------------------------------------------|-----------------|-------------|
| 11.4                            | 7.1                                         | 7.7                                          | 11.9            | 11.5        |

<sup>a</sup> Energies reported are relative to the lowest energy conformation of **1** exhibiting a sulfur–lone pair interaction.

<sup>b</sup> Fully optimized conformations of **1** at M06-2X/6-31+G(d,p) were used for single point calculations implementing solvation models and testing functionals and basis sets.

## II. Calculated coordinates and energies

### ii. M06-2X/6-31+G(d,p) calculations of ligands

**1** (w/ S–lone pair interaction):

Charge = 0 Multiplicity = 1

Link 0: opt freq=normal m062x/6-31+g(d,p)

HF = -1236.6640728 hartrees (-776019.072322728 kcal/mol)

Imaginary Frequencies: none found

Zero-point correction = 0.246234 (Hartree/Particle)

Temperature 298.150 Kelvin. Pressure 1.00000 Atm.

Sum of electronic and thermal Free Energies =

-1236.464956 hartrees (-775894.12453956 kcal/mol)

Coordinates (from last standard orientation):

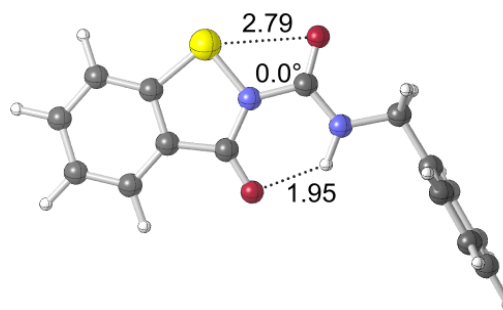

| Center<br>Number | Atomic<br>Number | Coordinates (Angstroms) |           |           |
|------------------|------------------|-------------------------|-----------|-----------|
|                  |                  | X                       | Y         | Z         |
| 1                | 6                | 3.484503                | 0.283430  | -0.000109 |
| 2                | 6                | 2.714955                | -0.879989 | 0.000039  |
| 3                | 6                | 3.310561                | -2.141448 | 0.000173  |
| 4                | 6                | 4.695033                | -2.219671 | 0.000147  |
| 5                | 6                | 5.467553                | -1.046527 | -0.000006 |
| 6                | 6                | 4.880142                | 0.212253  | -0.000138 |
| 7                | 6                | 1.270034                | -0.615856 | 0.000051  |
| 8                | 1                | 2.679951                | -3.025053 | 0.000278  |
| 9                | 1                | 5.186954                | -3.186281 | 0.000251  |
| 10               | 1                | 6.550483                | -1.122298 | -0.000017 |
| 11               | 1                | 5.488997                | 1.110338  | -0.000251 |
| 12               | 16               | 2.513683                | 1.739995  | -0.000245 |
| 13               | 7                | 1.080950                | 0.765533  | -0.000160 |
| 14               | 8                | 0.365926                | -1.438843 | 0.000187  |
| 15               | 6                | -0.143359               | 1.493098  | 0.000100  |
| 16               | 8                | -0.102086               | 2.712057  | -0.000141 |
| 17               | 7                | -1.262740               | 0.750590  | 0.000688  |
| 18               | 1                | -1.190641               | -0.262928 | 0.000469  |
| 19               | 6                | -2.557894               | 1.425164  | 0.000533  |
| 20               | 1                | -2.623440               | 2.072235  | -0.880757 |
| 21               | 1                | -2.623851               | 2.071927  | 0.882020  |
| 22               | 6                | -3.665023               | 0.401846  | 0.000158  |
| 23               | 6                | -4.171337               | -0.092129 | -1.204496 |
| 24               | 6                | -4.171950               | -0.092273 | 1.204492  |
| 25               | 6                | -5.170135               | -1.063335 | -1.206742 |
| 26               | 1                | -3.779723               | 0.289700  | -2.144179 |
| 27               | 6                | -5.170750               | -1.063479 | 1.206130  |
| 28               | 1                | -3.780803               | 0.289453  | 2.144411  |
| 29               | 6                | -5.671570               | -1.550123 | -0.000463 |
| 30               | 1                | -5.558293               | -1.438113 | -2.148680 |
| 31               | 1                | -5.559376               | -1.438367 | 2.147830  |
| 32               | 1                | -6.451964               | -2.304870 | -0.000717 |

**1** (lacking S–lone pair interaction):

Charge = 0 Multiplicity = 1  
 Link 0: opt freq=norman m062x/6-31+g(d,p)  
 HF = -1236.6458306 hartrees (-776007.625159806 kcal/mol)  
 Imaginary Frequencies: none found  
 Zero-point correction = 0.245911 (Hartree/Particle)  
 Temperature 298.150 Kelvin. Pressure 1.00000 Atm.  
 Sum of electronic and thermal Free Energies =  
 -1236.447102 hartrees (-775882.92097602 kcal/mol)

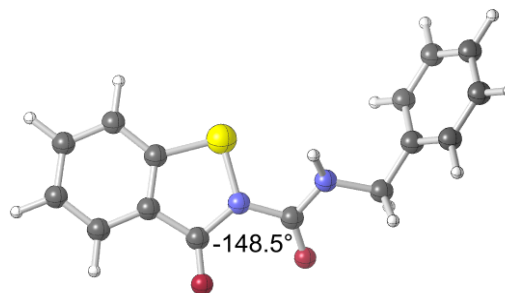

Coordinates (from last standard orientation):

| Center<br>Number | Atomic<br>Number | Coordinates (Angstroms) |   |   |
|------------------|------------------|-------------------------|---|---|
|                  |                  | X                       | Y | Z |

|    |    |           |           |           |
|----|----|-----------|-----------|-----------|
| 1  | 6  | 2.790810  | -1.040226 | -0.038514 |
| 2  | 6  | 3.313669  | 0.236614  | 0.140443  |
| 3  | 6  | 4.675666  | 0.423737  | 0.369368  |
| 4  | 6  | 5.503710  | -0.690068 | 0.408885  |
| 5  | 6  | 4.969046  | -1.974009 | 0.224741  |
| 6  | 6  | 3.610882  | -2.168793 | -0.000697 |
| 7  | 6  | 2.304497  | 1.316201  | 0.081109  |
| 8  | 1  | 5.052662  | 1.432260  | 0.509823  |
| 9  | 1  | 6.567597  | -0.571249 | 0.583312  |
| 10 | 1  | 5.626657  | -2.836952 | 0.257996  |
| 11 | 1  | 3.205942  | -3.165611 | -0.141115 |
| 12 | 16 | 1.058636  | -1.016246 | -0.312317 |
| 13 | 7  | 1.051437  | 0.715070  | -0.168103 |
| 14 | 8  | 2.490550  | 2.496771  | 0.250528  |
| 15 | 6  | -0.156115 | 1.446460  | -0.355829 |
| 16 | 8  | -0.173527 | 2.564595  | -0.809569 |
| 17 | 7  | -1.270629 | 0.728137  | -0.018491 |
| 18 | 1  | -1.182566 | -0.005235 | 0.674352  |
| 19 | 6  | -2.576665 | 1.365517  | -0.145429 |
| 20 | 1  | -2.606812 | 1.842111  | -1.130009 |
| 21 | 1  | -2.694959 | 2.161542  | 0.599644  |
| 22 | 6  | -3.675900 | 0.340901  | -0.001634 |
| 23 | 6  | -3.723470 | -0.768006 | -0.853804 |
| 24 | 6  | -4.658885 | 0.486854  | 0.977190  |
| 25 | 6  | -4.740045 | -1.710162 | -0.729173 |
| 26 | 1  | -2.957322 | -0.886408 | -1.616282 |
| 27 | 6  | -5.681075 | -0.454615 | 1.102415  |
| 28 | 1  | -4.626517 | 1.344120  | 1.644615  |
| 29 | 6  | -5.722644 | -1.554583 | 0.250275  |
| 30 | 1  | -4.769270 | -2.565320 | -1.397279 |
| 31 | 1  | -6.440811 | -0.328094 | 1.867255  |
| 32 | 1  | -6.515506 | -2.289529 | 0.347165  |

2 (with S–lone pair interaction):

Charge = 0 Multiplicity = 1  
 HF = -2752.6357786 hartrees (-1727306.47742929 kcal/mol)  
 Imaginary Frequencies: none found  
 Zero-point correction = 0.407670 (Hartree/Particle)  
 Temperature 298.150 Kelvin. Pressure 1.00000 Atm.  
 Sum of electronic and thermal Free Energies =  
 -2752.284462 hartrees (-1727086.02274962 kcal/mol)

Coordinates (from last standard orientation):

| Center<br>Number | Atomic<br>Number | Coordinates (Angstroms) |           |           |
|------------------|------------------|-------------------------|-----------|-----------|
|                  |                  | X                       | Y         | Z         |
| 1                | 6                | 1.191478                | -2.362715 | -1.474083 |
| 2                | 6                | 1.426404                | -1.446192 | -0.494400 |
| 3                | 6                | -0.730414               | -1.772421 | -0.151223 |
| 4                | 16               | -0.470296               | -2.853769 | -1.489151 |

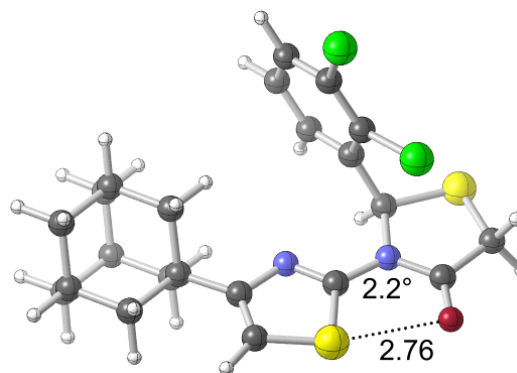

|    |    |           |           |           |
|----|----|-----------|-----------|-----------|
| 5  | 1  | 1.887715  | -2.774004 | -2.190507 |
| 6  | 7  | 0.315995  | -1.128008 | 0.263200  |
| 7  | 7  | -1.971243 | -1.562420 | 0.449522  |
| 8  | 6  | -2.065882 | -0.522238 | 1.464224  |
| 9  | 6  | -3.111740 | -2.232213 | 0.062128  |
| 10 | 6  | -4.334097 | -1.791347 | 0.841361  |
| 11 | 1  | -5.040056 | -1.336779 | 0.142481  |
| 12 | 8  | -3.133253 | -3.075051 | -0.809002 |
| 13 | 16 | -3.792918 | -0.616295 | 2.110724  |
| 14 | 1  | -4.791022 | -2.672888 | 1.293833  |
| 15 | 6  | -1.676773 | 0.871497  | 1.006244  |
| 16 | 6  | -0.783239 | 1.574713  | 1.814654  |
| 17 | 6  | -2.170869 | 1.495058  | -0.145517 |
| 18 | 6  | -0.380576 | 2.866476  | 1.498048  |
| 19 | 1  | -0.378381 | 1.081201  | 2.693754  |
| 20 | 6  | -1.749626 | 2.787964  | -0.475668 |
| 21 | 6  | -0.859419 | 3.474837  | 0.344854  |
| 22 | 1  | 0.318727  | 3.394083  | 2.138156  |
| 23 | 1  | -0.553204 | 4.476732  | 0.065488  |
| 24 | 17 | -3.304601 | 0.686085  | -1.184030 |
| 25 | 17 | -2.321421 | 3.576783  | -1.912010 |
| 26 | 6  | 2.707833  | -0.718302 | -0.188056 |
| 27 | 6  | 3.115982  | -0.963687 | 1.281654  |
| 28 | 6  | 3.859187  | -1.161127 | -1.105408 |
| 29 | 6  | 2.470700  | 0.797390  | -0.387885 |
| 30 | 1  | 3.278500  | -2.038905 | 1.437430  |
| 31 | 1  | 2.290136  | -0.659336 | 1.936555  |
| 32 | 6  | 4.390257  | -0.176135 | 1.617461  |
| 33 | 1  | 3.580858  | -0.992182 | -2.154938 |
| 34 | 1  | 4.040603  | -2.237931 | -0.980841 |
| 35 | 6  | 5.136311  | -0.373042 | -0.771386 |
| 36 | 1  | 1.635633  | 1.115655  | 0.248463  |
| 37 | 1  | 2.172683  | 0.980515  | -1.429487 |
| 38 | 6  | 3.743303  | 1.585678  | -0.051029 |
| 39 | 1  | 4.666810  | -0.364158 | 2.662050  |
| 40 | 6  | 5.529151  | -0.630426 | 0.691597  |
| 41 | 6  | 4.131215  | 1.324730  | 1.412864  |
| 42 | 1  | 5.945641  | -0.703062 | -1.433651 |
| 43 | 6  | 4.883506  | 1.129335  | -0.973832 |
| 44 | 1  | 3.554550  | 2.656374  | -0.197992 |
| 45 | 1  | 5.732799  | -1.698398 | 0.844489  |
| 46 | 1  | 6.451112  | -0.085597 | 0.933200  |
| 47 | 1  | 3.323344  | 1.658713  | 2.078391  |
| 48 | 1  | 5.028874  | 1.900286  | 1.673929  |
| 49 | 1  | 5.797902  | 1.695381  | -0.753239 |
| 50 | 1  | 4.621090  | 1.329585  | -2.020850 |
| 51 | 1  | -1.393903 | -0.786624 | 2.284145  |

-----

**2** (lacking S–lone pair interaction):

Charge = 0 Multiplicity = 1  
 HF = -2752.6198458 hartrees (-1727296.47943796 kcal/mol)  
 Imaginary Frequencies: none found  
 Zero-point correction = 0.407529 (Hartree/Particle)  
 Temperature 298.150 Kelvin. Pressure 1.00000 Atm.

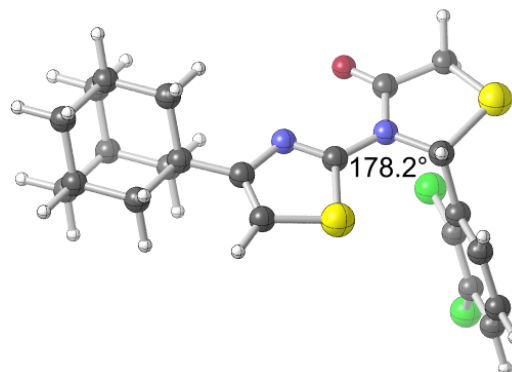

Sum of electronic and thermal Free Energies =  
-2752.268709 hartrees (-1727076.13758459 kcal/mol)

Coordinates (from last standard orientation):

| Center<br>Number | Atomic<br>Number | Coordinates (Angstroms) |           |           |
|------------------|------------------|-------------------------|-----------|-----------|
|                  |                  | X                       | Y         | Z         |
| 1                | 6                | 1.367481                | -1.111095 | -1.696373 |
| 2                | 6                | 1.937813                | -0.301134 | -0.761376 |
| 3                | 6                | -0.097351               | 0.554194  | -0.708304 |
| 4                | 16               | -0.303389               | -0.718483 | -1.904752 |
| 5                | 1                | 1.812689                | -1.918836 | -2.257887 |
| 6                | 7                | 1.090440                | 0.642779  | -0.214002 |
| 7                | 7                | -1.159532               | 1.407929  | -0.389666 |
| 8                | 6                | -2.425572               | 1.272243  | -1.092034 |
| 9                | 6                | -1.049270               | 2.409075  | 0.584003  |
| 10               | 6                | -2.290176               | 3.289478  | 0.632232  |
| 11               | 1                | -2.737500               | 3.194994  | 1.623513  |
| 12               | 8                | -0.108134               | 2.585918  | 1.310640  |
| 13               | 16               | -3.427530               | 2.762247  | -0.669706 |
| 14               | 1                | -1.972607               | 4.321676  | 0.475887  |
| 15               | 6                | -3.192223               | -0.017337 | -0.847954 |
| 16               | 6                | -3.693624               | -0.672869 | -1.973360 |
| 17               | 6                | -3.466005               | -0.553642 | 0.417737  |
| 18               | 6                | -4.434847               | -1.843417 | -1.862244 |
| 19               | 1                | -3.480896               | -0.259658 | -2.955971 |
| 20               | 6                | -4.196319               | -1.741665 | 0.527874  |
| 21               | 6                | -4.680456               | -2.385525 | -0.608160 |
| 22               | 1                | -4.812184               | -2.338428 | -2.750367 |
| 23               | 1                | -5.244626               | -3.304099 | -0.491254 |
| 24               | 17               | -2.927807               | 0.243527  | 1.860420  |
| 25               | 17               | -4.529350               | -2.444453 | 2.077530  |
| 26               | 6                | 3.361726                | -0.333354 | -0.272605 |
| 27               | 6                | 3.372112                | -0.650721 | 1.240573  |
| 28               | 6                | 4.196705                | -1.393635 | -1.008859 |
| 29               | 6                | 4.006914                | 1.054092  | -0.488770 |
| 30               | 1                | 2.905692                | -1.631556 | 1.406162  |
| 31               | 1                | 2.764259                | 0.096255  | 1.764779  |
| 32               | 6                | 4.813467                | -0.649816 | 1.770163  |
| 33               | 1                | 4.193010                | -1.184295 | -2.087965 |
| 34               | 1                | 3.747987                | -2.386371 | -0.862807 |
| 35               | 6                | 5.639747                | -1.392551 | -0.480323 |
| 36               | 1                | 3.402670                | 1.811086  | 0.024432  |
| 37               | 1                | 3.994904                | 1.293984  | -1.561022 |
| 38               | 6                | 5.448156                | 1.055978  | 0.040332  |
| 39               | 1                | 4.803003                | -0.878341 | 2.842677  |
| 40               | 6                | 5.633400                | -1.712309 | 1.022662  |
| 41               | 6                | 5.440519                | 0.734537  | 1.543248  |
| 42               | 1                | 6.219558                | -2.153116 | -1.017203 |
| 43               | 6                | 6.267201                | -0.008052 | -0.706350 |
| 44               | 1                | 5.891513                | 2.045615  | -0.122938 |
| 45               | 1                | 5.202786                | -2.707969 | 1.193366  |
| 46               | 1                | 6.662300                | -1.733112 | 1.405070  |
| 47               | 1                | 4.869594                | 1.497945  | 2.086592  |
| 48               | 1                | 6.466089                | 0.750156  | 1.935081  |

|    |   |           |           |           |
|----|---|-----------|-----------|-----------|
| 49 | 1 | 7.304907  | -0.005693 | -0.348096 |
| 50 | 1 | 6.292401  | 0.222148  | -1.779734 |
| 51 | 1 | -2.226858 | 1.326003  | -2.168234 |

-----  
**VO2** (w/ S-lone pair close contact):

Charge = 0 Multiplicity = 1  
 HF = -1295.3587971 hartrees (-812850.598768221 kcal/mol)  
 Imaginary Frequencies: none found  
 Zero-point correction = 0.313615 (Hartree/Particle)  
 Temperature 298.150 Kelvin. Pressure 1.00000 Atm.  
 Sum of electronic and thermal Free Energies =  
 -1295.097900 hartrees (-812686.883229 kcal/mol)

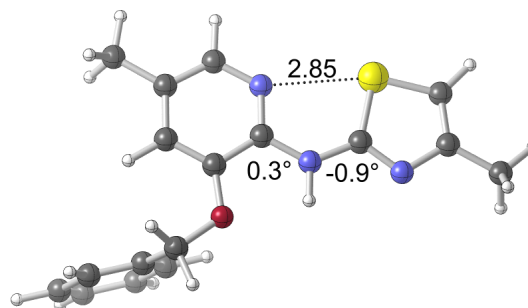

-----  
 Coordinates (from last standard orientation):

| Center Number | Atomic Number | Coordinates (Angstroms) |           |           |
|---------------|---------------|-------------------------|-----------|-----------|
|               |               | X                       | Y         | Z         |
| 1             | 6             | 5.619280                | -1.106562 | 0.194899  |
| 2             | 6             | 4.650343                | -0.980860 | -0.798812 |
| 3             | 6             | 3.304877                | -1.211425 | -0.507256 |
| 4             | 6             | 2.933513                | -1.557210 | 0.792523  |
| 5             | 6             | 3.901196                | -1.675642 | 1.788224  |
| 6             | 6             | 5.245328                | -1.454325 | 1.491850  |
| 7             | 1             | 6.663117                | -0.925380 | -0.041883 |
| 8             | 1             | 4.943167                | -0.698501 | -1.808006 |
| 9             | 1             | 1.884765                | -1.722878 | 1.022124  |
| 10            | 1             | 3.604027                | -1.940221 | 2.798189  |
| 11            | 1             | 5.997312                | -1.548122 | 2.268847  |
| 12            | 6             | 2.272393                | -1.114396 | -1.609495 |
| 13            | 1             | 2.173720                | -2.075266 | -2.121965 |
| 14            | 1             | 2.568954                | -0.361656 | -2.352704 |
| 15            | 8             | 0.966390                | -0.832951 | -1.133497 |
| 16            | 6             | 0.708846                | 0.424856  | -0.671131 |
| 17            | 6             | -0.637919               | 0.654679  | -0.284400 |
| 18            | 6             | 1.610002                | 1.460355  | -0.553093 |
| 19            | 6             | 1.172845                | 2.708960  | -0.066042 |
| 20            | 1             | 2.655167                | 1.319180  | -0.811725 |
| 21            | 6             | -0.162540               | 2.822036  | 0.277463  |
| 22            | 1             | -0.555411               | 3.760938  | 0.660469  |
| 23            | 7             | -1.051718               | 1.819479  | 0.173580  |
| 24            | 6             | 2.133589                | 3.858474  | 0.078092  |
| 25            | 1             | 2.583909                | 4.121722  | -0.884378 |
| 26            | 1             | 1.623760                | 4.744512  | 0.464019  |
| 27            | 1             | 2.946632                | 3.609510  | 0.767510  |
| 28            | 7             | -1.529992               | -0.391200 | -0.399498 |
| 29            | 6             | -2.871578               | -0.397262 | -0.092133 |
| 30            | 16            | -3.746367               | 0.967131  | 0.551964  |
| 31            | 6             | -4.888546               | -1.276706 | 0.094783  |
| 32            | 6             | -5.167898               | -0.030202 | 0.562219  |
| 33            | 1             | -6.115923               | 0.355592  | 0.908773  |
| 34            | 7             | -3.575298               | -1.478228 | -0.276478 |
| 35            | 1             | -1.181287               | -1.264455 | -0.773578 |
| 36            | 6             | -5.855609               | -2.410933 | -0.045707 |

|    |   |           |           |           |
|----|---|-----------|-----------|-----------|
| 37 | 1 | -5.907855 | -2.738282 | -1.088145 |
| 38 | 1 | -5.528344 | -3.265745 | 0.553283  |
| 39 | 1 | -6.854627 | -2.114811 | 0.280609  |

-----  
**VO2** (lacking S–lone pair close contact):

Charge = 0 Multiplicity = 1  
 HF = -1295.3484576 hartrees (-812844.110628576 kcal/mol)  
 Imaginary Frequencies: none found  
 Zero-point correction = 0.312971 (Hartree/Particle)  
 Temperature 298.150 Kelvin. Pressure 1.00000 Atm.  
 Sum of electronic and thermal Free Energies =  
 -1295.084581 hartrees (-812678.52542331 kcal/mol)

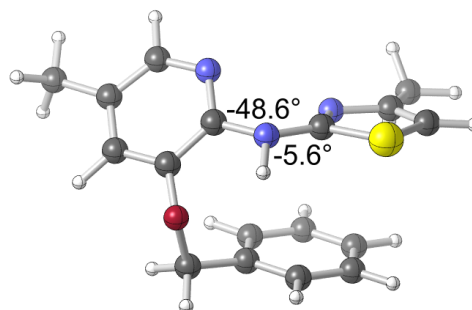

Coordinates (from last standard orientation):

| Center Number | Atomic Number | Coordinates (Angstroms) |           |           |
|---------------|---------------|-------------------------|-----------|-----------|
|               |               | X                       | Y         | Z         |
| 1             | 6             | 2.265539                | 2.196527  | 0.299853  |
| 2             | 6             | 1.068271                | 2.545419  | -0.319568 |
| 3             | 6             | -0.156349               | 2.286124  | 0.303734  |
| 4             | 6             | -0.164161               | 1.672585  | 1.558112  |
| 5             | 6             | 1.032982                | 1.330341  | 2.184563  |
| 6             | 6             | 2.248353                | 1.593392  | 1.557644  |
| 7             | 1             | 3.210662                | 2.391517  | -0.197502 |
| 8             | 1             | 1.081098                | 3.020466  | -1.298941 |
| 9             | 1             | -1.113329               | 1.453329  | 2.041826  |
| 10            | 1             | 1.012814                | 0.843430  | 3.154650  |
| 11            | 1             | 3.181798                | 1.317222  | 2.039242  |
| 12            | 6             | -1.446639               | 2.611974  | -0.403748 |
| 13            | 1             | -1.352031               | 3.522993  | -0.998807 |
| 14            | 1             | -2.262451               | 2.742914  | 0.317898  |
| 15            | 8             | -1.820425               | 1.595998  | -1.355268 |
| 16            | 6             | -2.184358               | 0.398589  | -0.782751 |
| 17            | 6             | -1.274230               | -0.675245 | -0.800337 |
| 18            | 6             | -3.431011               | 0.207646  | -0.215546 |
| 19            | 6             | -3.750267               | -1.033246 | 0.346168  |
| 20            | 1             | -4.144920               | 1.028962  | -0.213422 |
| 21            | 6             | -2.764770               | -2.017794 | 0.282257  |
| 22            | 1             | -2.957504               | -3.002831 | 0.703786  |
| 23            | 7             | -1.567810               | -1.859327 | -0.287083 |
| 24            | 6             | -5.094352               | -1.296332 | 0.971341  |
| 25            | 1             | -5.897919               | -1.196145 | 0.235068  |
| 26            | 1             | -5.140702               | -2.307209 | 1.383406  |
| 27            | 1             | -5.298622               | -0.591228 | 1.783000  |
| 28            | 7             | -0.043271               | -0.486064 | -1.440533 |
| 29            | 6             | 1.157833                | -0.879378 | -0.874683 |
| 30            | 16            | 2.623188                | -0.719739 | -1.825916 |
| 31            | 6             | 2.659144                | -1.606814 | 0.561519  |
| 32            | 6             | 3.510513                | -1.306281 | -0.456843 |
| 33            | 1             | 4.586394                | -1.400338 | -0.482270 |
| 34            | 7             | 1.322421                | -1.359873 | 0.313520  |
| 35            | 1             | -0.002406               | 0.377821  | -1.967458 |
| 36            | 6             | 3.043447                | -2.141717 | 1.904898  |



|    |   |          |           |          |
|----|---|----------|-----------|----------|
| 37 | 1 | 2.561849 | -3.108204 | 2.078740 |
| 38 | 1 | 4.125534 | -2.264442 | 1.986612 |
| 39 | 1 | 2.703072 | -1.458295 | 2.689965 |

-----

**PRD** (w/ S-lone pair close contact):

Charge = 0 Multiplicity = 1  
 HF = -1924.9475356 hartrees (-1207923.82806436 kcal/mol)  
 Imaginary Frequencies: none found  
 Zero-point correction = 0.586226 (Hartree/Particle)  
 Temperature 298.150 Kelvin. Pressure 1.00000 Atm.  
 Sum of electronic and thermal Free Energies =  
 -1924.428839 hartrees (-1207598.34076089 kcal/mol)

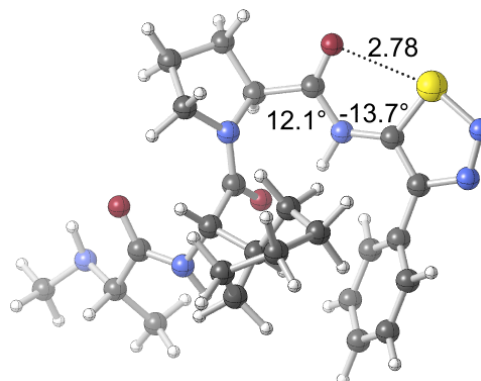

Coordinates (from last standard orientation):

| Center Number | Atomic Number | Coordinates (Angstroms) |           |           |
|---------------|---------------|-------------------------|-----------|-----------|
|               |               | X                       | Y         | Z         |
| 1             | 6             | 3.184402                | -0.758393 | 0.913753  |
| 2             | 6             | 3.456549                | 0.591262  | 1.053343  |
| 3             | 16            | 4.637571                | -1.566145 | 0.502918  |
| 4             | 7             | 5.511645                | -0.107463 | 0.536512  |
| 5             | 7             | 4.774720                | 0.889557  | 0.819268  |
| 6             | 6             | 2.489921                | 1.671799  | 1.328405  |
| 7             | 6             | 2.595571                | 2.883697  | 0.629880  |
| 8             | 6             | 1.456312                | 1.513385  | 2.256729  |
| 9             | 6             | 1.671533                | 3.901488  | 0.841925  |
| 10            | 1             | 3.410067                | 3.011915  | -0.076698 |
| 11            | 6             | 0.525055                | 2.530333  | 2.460996  |
| 12            | 1             | 1.381336                | 0.600851  | 2.841796  |
| 13            | 6             | 0.627498                | 3.725081  | 1.753302  |
| 14            | 1             | 1.764200                | 4.835032  | 0.294846  |
| 15            | 1             | -0.274666               | 2.383629  | 3.180146  |
| 16            | 1             | -0.094259               | 4.519773  | 1.916017  |
| 17            | 7             | 1.941757                | -1.351845 | 1.012587  |
| 18            | 1             | 1.141210                | -0.769238 | 1.271591  |
| 19            | 6             | 1.666185                | -2.608254 | 0.532870  |
| 20            | 8             | 2.544493                | -3.372911 | 0.179617  |
| 21            | 6             | 0.165419                | -2.940485 | 0.459128  |
| 22            | 6             | -0.094256               | -4.320565 | -0.158998 |
| 23            | 1             | -0.264896               | -2.832249 | 1.461982  |
| 24            | 6             | -1.088000               | -2.691633 | -1.610282 |
| 25            | 6             | -1.308808               | -4.102761 | -1.066502 |
| 26            | 1             | -0.258250               | -5.078647 | 0.608514  |
| 27            | 1             | 0.781601                | -4.617931 | -0.741719 |
| 28            | 1             | -2.019992               | -2.217256 | -1.916783 |
| 29            | 1             | -0.366559               | -2.687028 | -2.437002 |
| 30            | 1             | -2.238128               | -4.114901 | -0.487919 |
| 31            | 1             | -1.382861               | -4.848846 | -1.860465 |
| 32            | 7             | -0.527341               | -1.994475 | -0.441471 |
| 33            | 6             | -0.895791               | -0.781461 | 0.018250  |
| 34            | 8             | -0.654803               | -0.423463 | 1.178046  |
| 35            | 6             | -1.506363               | 0.245915  | -0.937987 |

|    |   |           |           |           |
|----|---|-----------|-----------|-----------|
| 36 | 1 | -1.831879 | -0.216657 | -1.873415 |
| 37 | 7 | -2.672876 | 0.826376  | -0.299945 |
| 38 | 1 | -2.505011 | 1.592644  | 0.338455  |
| 39 | 6 | -3.747747 | 0.021827  | -0.082897 |
| 40 | 8 | -3.801733 | -1.107636 | -0.560146 |
| 41 | 6 | -4.916560 | 0.613620  | 0.707221  |
| 42 | 1 | -5.513377 | 1.168690  | -0.045909 |
| 43 | 6 | -4.478007 | 1.595424  | 1.795677  |
| 44 | 1 | -4.068453 | 2.520554  | 1.376973  |
| 45 | 1 | -5.341107 | 1.877813  | 2.402760  |
| 46 | 1 | -3.740519 | 1.126940  | 2.454035  |
| 47 | 7 | -5.675189 | -0.484187 | 1.275401  |
| 48 | 6 | -0.441702 | 1.316832  | -1.242722 |
| 49 | 6 | 0.832217  | 0.652791  | -1.812294 |
| 50 | 6 | -0.985397 | 2.387053  | -2.215811 |
| 51 | 1 | -0.177078 | 1.793258  | -0.286690 |
| 52 | 6 | 1.623477  | 1.645184  | -2.663170 |
| 53 | 1 | 0.558361  | -0.211389 | -2.437073 |
| 54 | 1 | 1.449246  | 0.262040  | -0.996494 |
| 55 | 6 | -0.687441 | 2.008337  | -3.668364 |
| 56 | 1 | -2.060388 | 2.526469  | -2.060403 |
| 57 | 1 | -0.508161 | 3.349310  | -1.991444 |
| 58 | 6 | 0.831937  | 2.017189  | -3.931340 |
| 59 | 1 | 1.816498  | 2.541873  | -2.062154 |
| 60 | 1 | 2.601827  | 1.231754  | -2.926829 |
| 61 | 1 | -1.097502 | 1.009161  | -3.867379 |
| 62 | 1 | -1.199147 | 2.687916  | -4.356618 |
| 63 | 1 | 1.143976  | 3.007682  | -4.280256 |
| 64 | 1 | 1.068184  | 1.313222  | -4.737234 |
| 65 | 1 | -5.574037 | -1.291942 | 0.667315  |
| 66 | 6 | -7.077436 | -0.174318 | 1.498802  |
| 67 | 1 | -7.592536 | -1.072116 | 1.847142  |
| 68 | 1 | -7.180669 | 0.583493  | 2.281492  |
| 69 | 1 | -7.592252 | 0.198747  | 0.596629  |

-----  
**PRD** (lacking S–lone pair close contact):

Charge = 0 Multiplicity = 1  
HF = -1924.9305549 hartrees (-1207913.1725053 kcal/mol)  
Imaginary Frequencies: none found  
Zero-point correction = 0.585636 (Hartree/Particle)  
Temperature 298.150 Kelvin. Pressure 1.00000 Atm.  
Sum of electronic and thermal Free Energies =  
-1924.415341 hartrees (-1207589.87063091 kcal/mol)

Coordinates (from last standard orientation):

| Center<br>Number | Atomic<br>Number | Coordinates (Angstroms) |          |           |
|------------------|------------------|-------------------------|----------|-----------|
|                  |                  | X                       | Y        | Z         |
| 1                | 6                | 3.385542                | 0.314764 | 1.020924  |
| 2                | 6                | 4.049389                | 0.601743 | -0.152332 |
| 3                | 16               | 3.731293                | 1.556634 | 2.153627  |
| 4                | 7                | 4.688854                | 2.399186 | 1.016149  |
| 5                | 7                | 4.765387                | 1.773546 | -0.083403 |

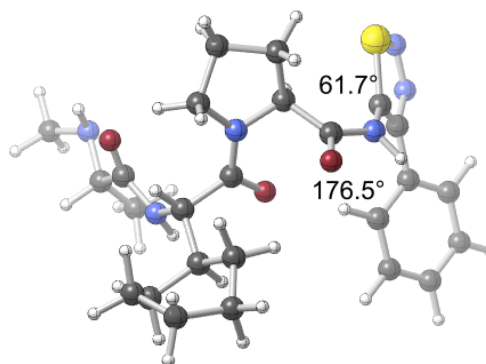

|    |   |           |           |           |
|----|---|-----------|-----------|-----------|
| 6  | 6 | 4.074979  | -0.216432 | -1.378284 |
| 7  | 6 | 5.251309  | -0.284351 | -2.134703 |
| 8  | 6 | 2.935297  | -0.915351 | -1.797800 |
| 9  | 6 | 5.293695  | -1.058500 | -3.289954 |
| 10 | 1 | 6.122746  | 0.276888  | -1.811695 |
| 11 | 6 | 2.989137  | -1.691489 | -2.953479 |
| 12 | 1 | 2.002233  | -0.822937 | -1.247202 |
| 13 | 6 | 4.164745  | -1.769146 | -3.698116 |
| 14 | 1 | 6.208761  | -1.107312 | -3.871763 |
| 15 | 1 | 2.101903  | -2.227082 | -3.276634 |
| 16 | 1 | 4.199290  | -2.374474 | -4.598639 |
| 17 | 7 | 2.711583  | -0.866459 | 1.316750  |
| 18 | 1 | 3.126416  | -1.722704 | 0.959789  |
| 19 | 6 | 1.423890  | -1.041688 | 1.778502  |
| 20 | 8 | 0.972531  | -2.159374 | 1.924564  |
| 21 | 6 | 0.606988  | 0.202186  | 2.128832  |
| 22 | 6 | 0.466722  | 0.389834  | 3.649651  |
| 23 | 1 | 1.020217  | 1.088016  | 1.635418  |
| 24 | 6 | -1.749891 | 0.167276  | 2.759153  |
| 25 | 6 | -0.952701 | 0.948583  | 3.804805  |
| 26 | 1 | 1.240016  | 1.046157  | 4.055417  |
| 27 | 1 | 0.541452  | -0.587362 | 4.138609  |
| 28 | 1 | -2.622676 | 0.714894  | 2.398881  |
| 29 | 1 | -2.050075 | -0.816215 | 3.144388  |
| 30 | 1 | -0.971494 | 2.014440  | 3.555624  |
| 31 | 1 | -1.351147 | 0.821345  | 4.813341  |
| 32 | 7 | -0.767730 | 0.008861  | 1.679989  |
| 33 | 6 | -0.976258 | -0.250103 | 0.375843  |
| 34 | 8 | -0.039696 | -0.291106 | -0.425955 |
| 35 | 6 | -2.403178 | -0.498817 | -0.116075 |
| 36 | 1 | -3.123960 | -0.429939 | 0.702615  |
| 37 | 7 | -2.740855 | 0.550940  | -1.064435 |
| 38 | 1 | -2.278806 | 0.511878  | -1.962868 |
| 39 | 6 | -3.215986 | 1.745207  | -0.623995 |
| 40 | 8 | -3.507089 | 1.935309  | 0.552809  |
| 41 | 6 | -3.459981 | 2.830010  | -1.678656 |
| 42 | 1 | -4.497747 | 2.649396  | -2.029210 |
| 43 | 6 | -2.524877 | 2.747438  | -2.885588 |
| 44 | 1 | -2.716797 | 1.857869  | -3.494042 |
| 45 | 1 | -2.684905 | 3.611674  | -3.534319 |
| 46 | 1 | -1.479495 | 2.758783  | -2.563545 |
| 47 | 7 | -3.345267 | 4.117025  | -1.018715 |
| 48 | 6 | -2.487078 | -1.890339 | -0.756244 |
| 49 | 6 | -1.945513 | -2.948427 | 0.228917  |
| 50 | 6 | -3.932480 | -2.215209 | -1.193539 |
| 51 | 1 | -1.830426 | -1.879506 | -1.637177 |
| 52 | 6 | -2.515813 | -4.326910 | -0.102490 |
| 53 | 1 | -2.234108 | -2.683715 | 1.257939  |
| 54 | 1 | -0.851489 | -2.949938 | 0.217889  |
| 55 | 6 | -4.677850 | -2.974260 | -0.094216 |
| 56 | 1 | -4.457451 | -1.291137 | -1.459494 |
| 57 | 1 | -3.912209 | -2.833292 | -2.099590 |
| 58 | 6 | -4.039421 | -4.357768 | 0.135448  |
| 59 | 1 | -2.292852 | -4.555794 | -1.152702 |
| 60 | 1 | -2.020854 | -5.100160 | 0.492313  |
| 61 | 1 | -4.644290 | -2.385986 | 0.832487  |

|    |   |           |           |           |
|----|---|-----------|-----------|-----------|
| 62 | 1 | -5.737167 | -3.080166 | -0.347989 |
| 63 | 1 | -4.501132 | -5.093391 | -0.532883 |
| 64 | 1 | -4.248549 | -4.690570 | 1.158330  |
| 65 | 1 | -3.654308 | 4.007678  | -0.056884 |
| 66 | 6 | -4.077896 | 5.184429  | -1.678873 |
| 67 | 1 | -4.040917 | 6.082033  | -1.057978 |
| 68 | 1 | -3.611456 | 5.433590  | -2.636857 |
| 69 | 1 | -5.135795 | 4.934501  | -1.871664 |

-----  
**3** (w/ S-lone pair interaction):

Charge = 0 Multiplicity = 1  
 HF = -1518.7025841 hartrees (-953001.058548591 kcal/mol)  
 Imaginary Frequencies: none found  
 Zero-point correction = 0.297083 (Hartree/Particle)  
 Temperature 298.150 Kelvin. Pressure 1.00000 Atm.  
 Sum of electronic and thermal Free Energies =  
 -1518.460551 hartrees (-952849.18035801 kcal/mol)

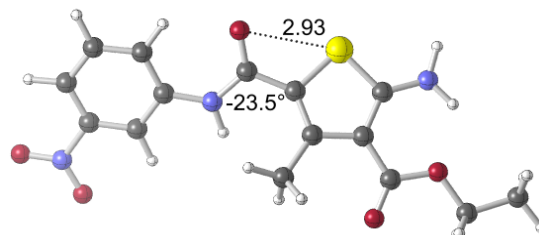

Coordinates (from last standard orientation):

| Center Number | Atomic Number | Coordinates (Angstroms) |           |           |
|---------------|---------------|-------------------------|-----------|-----------|
|               |               | X                       | Y         | Z         |
| 1             | 6             | 0.801776                | 1.044282  | 0.064978  |
| 2             | 6             | 1.454757                | -0.131831 | 0.327019  |
| 3             | 6             | 2.869514                | -0.034019 | 0.058959  |
| 4             | 6             | 3.244068                | 1.241526  | -0.365948 |
| 5             | 16            | 1.891242                | 2.314957  | -0.445113 |
| 6             | 6             | 0.817663                | -1.366814 | 0.909065  |
| 7             | 6             | -0.611231               | 1.463655  | 0.167488  |
| 8             | 7             | 4.466089                | 1.690686  | -0.742539 |
| 9             | 1             | 4.615085                | 2.678143  | -0.871625 |
| 10            | 1             | 5.263138                | 1.103262  | -0.548639 |
| 11            | 8             | -0.913751               | 2.636475  | 0.333342  |
| 12            | 7             | -1.537690               | 0.456728  | 0.010084  |
| 13            | 6             | 3.785072                | -1.170096 | 0.201310  |
| 14            | 8             | 3.463040                | -2.311802 | 0.453086  |
| 15            | 8             | 5.084761                | -0.825697 | 0.011475  |
| 16            | 6             | 6.035631                | -1.900703 | 0.108161  |
| 17            | 6             | 7.406430                | -1.307069 | -0.132745 |
| 18            | 6             | -2.934270               | 0.547642  | 0.102425  |
| 19            | 6             | -3.617731               | 1.713417  | 0.481625  |
| 20            | 6             | -3.661147               | -0.610499 | -0.193133 |
| 21            | 6             | -5.008922               | 1.701791  | 0.560255  |
| 22            | 1             | -3.059824               | 2.611953  | 0.702849  |
| 23            | 6             | -5.042568               | -0.574539 | -0.103408 |
| 24            | 1             | -3.171801               | -1.532405 | -0.489250 |
| 25            | 6             | -5.749176               | 0.560539  | 0.269064  |
| 26            | 1             | -5.523816               | 2.610278  | 0.854176  |
| 27            | 1             | -6.830013               | 0.536389  | 0.323448  |
| 28            | 7             | -5.788417               | -1.807090 | -0.420809 |
| 29            | 8             | -5.144461               | -2.792118 | -0.737902 |
| 30            | 8             | -7.002687               | -1.765364 | -0.346572 |
| 31            | 1             | -1.176661               | -0.438204 | -0.287894 |

|    |   |           |           |           |
|----|---|-----------|-----------|-----------|
| 32 | 1 | 1.481665  | -1.813183 | 1.649228  |
| 33 | 1 | -0.131904 | -1.132344 | 1.392286  |
| 34 | 1 | 0.664747  | -2.135604 | 0.143503  |
| 35 | 1 | 5.949562  | -2.353870 | 1.099387  |
| 36 | 1 | 5.777622  | -2.661793 | -0.633528 |
| 37 | 1 | 7.466880  | -0.857428 | -1.127727 |
| 38 | 1 | 7.634818  | -0.542837 | 0.615202  |
| 39 | 1 | 8.166347  | -2.089572 | -0.064883 |

-----  
**3** (lacking S–lone pair interaction):

Charge = 0 Multiplicity = 1  
 HF = -1518.7019945 hartrees (-953000.688568695 kcal/mol)  
 Imaginary Frequencies: none found  
 Zero-point correction = 0.296978 (Hartree/Particle)  
 Temperature 298.150 Kelvin. Pressure 1.00000 Atm.  
 Sum of electronic and thermal Free Energies =  
 -1518.460186 hartrees (-952848.95131686 kcal/mol)

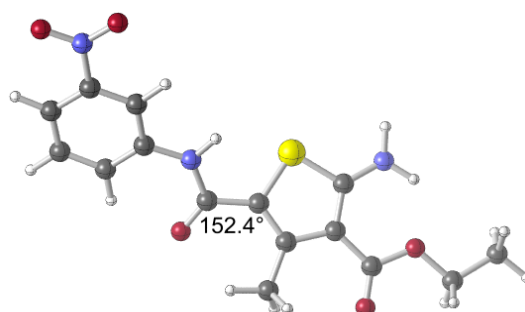

Coordinates (from last standard orientation):

| Center<br>Number | Atomic<br>Number | Coordinates (Angstroms) |           |           |
|------------------|------------------|-------------------------|-----------|-----------|
|                  |                  | X                       | Y         | Z         |
| 1                | 6                | -0.756111               | 0.518680  | -0.261953 |
| 2                | 6                | -1.947946               | 1.077677  | 0.115183  |
| 3                | 6                | -3.050642               | 0.153044  | -0.015885 |
| 4                | 6                | -2.657805               | -1.093751 | -0.494121 |
| 5                | 16               | -0.955091               | -1.139532 | -0.810167 |
| 6                | 6                | -2.098972               | 2.472169  | 0.649460  |
| 7                | 1                | -2.713544               | 3.067402  | -0.031483 |
| 8                | 1                | -2.630368               | 2.451136  | 1.603186  |
| 9                | 1                | -1.128061               | 2.949260  | 0.759201  |
| 10               | 6                | 0.585272                | 1.140739  | -0.243881 |
| 11               | 7                | -3.408104               | -2.182686 | -0.792028 |
| 12               | 1                | -2.960655               | -3.072106 | -0.942020 |
| 13               | 1                | -4.377767               | -2.169864 | -0.511775 |
| 14               | 8                | 0.765471                | 2.341782  | -0.357857 |
| 15               | 7                | 1.625719                | 0.238510  | -0.093891 |
| 16               | 6                | -4.432138               | 0.513197  | 0.327451  |
| 17               | 8                | -4.806186               | 1.598408  | 0.711653  |
| 18               | 8                | -5.298094               | -0.522798 | 0.170379  |
| 19               | 6                | -6.672641               | -0.237884 | 0.484720  |
| 20               | 1                | -6.732990               | 0.076579  | 1.530290  |
| 21               | 1                | -7.005604               | 0.597262  | -0.137323 |
| 22               | 6                | -7.462350               | -1.500992 | 0.219851  |
| 23               | 1                | -7.108649               | -2.320971 | 0.851040  |
| 24               | 1                | -8.518721               | -1.330941 | 0.442218  |
| 25               | 1                | -7.377582               | -1.799471 | -0.828698 |
| 26               | 6                | 3.003174                | 0.501901  | -0.127934 |
| 27               | 6                | 3.553545                | 1.736993  | -0.503415 |
| 28               | 6                | 3.855463                | -0.553265 | 0.214066  |
| 29               | 6                | 4.937632                | 1.895492  | -0.533012 |
| 30               | 1                | 2.900222                | 2.558360  | -0.759750 |
| 31               | 6                | 5.224643                | -0.350124 | 0.170686  |

|    |   |          |           |           |
|----|---|----------|-----------|-----------|
| 32 | 1 | 3.472530 | -1.523641 | 0.511520  |
| 33 | 6 | 5.800748 | 0.857863  | -0.196486 |
| 34 | 1 | 5.347314 | 2.856056  | -0.826927 |
| 35 | 1 | 6.877601 | 0.966122  | -0.213351 |
| 36 | 7 | 6.103433 | -1.477639 | 0.534359  |
| 37 | 8 | 5.574164 | -2.534149 | 0.834075  |
| 38 | 8 | 7.305014 | -1.284342 | 0.512656  |
| 39 | 1 | 1.376197 | -0.701621 | 0.181859  |

4 (w/ S-lone pair interaction):

Charge = 0 Multiplicity = 1  
 HF = -1671.0060974 hartrees (-1048573.03617947 kcal/mol)  
 Imaginary Frequencies: none found  
 Zero-point correction = 0.392668 (Hartree/Particle)  
 Temperature 298.150 Kelvin. Pressure 1.00000 Atm.  
 Sum of electronic and thermal Free Energies =  
 -1670.677344 hartrees (-1048366.74013344 kcal/mol)

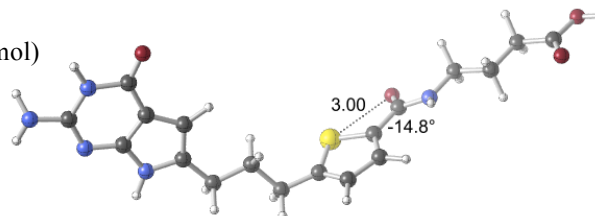

Coordinates (from last standard orientation):

| Center Number | Atomic Number | Coordinates (Angstroms) |           |           |
|---------------|---------------|-------------------------|-----------|-----------|
|               |               | X                       | Y         | Z         |
| 1             | 6             | -5.568016               | -0.995057 | -0.070608 |
| 2             | 6             | -6.474371               | 0.061520  | -0.043925 |
| 3             | 6             | -8.296884               | -1.206615 | 0.090422  |
| 4             | 6             | -6.085830               | -2.333160 | -0.024991 |
| 5             | 6             | -4.254382               | -0.436315 | -0.159133 |
| 6             | 6             | -4.400649               | 0.926487  | -0.181568 |
| 7             | 1             | -7.928498               | -3.243736 | 0.013274  |
| 8             | 1             | -3.326134               | -0.986808 | -0.198874 |
| 9             | 1             | -6.171968               | 2.136614  | -0.104158 |
| 10            | 6             | -3.393868               | 2.029895  | -0.277322 |
| 11            | 1             | -3.575260               | 2.612487  | -1.192147 |
| 12            | 1             | -3.527001               | 2.724900  | 0.564067  |
| 13            | 6             | -1.955327               | 1.518805  | -0.283657 |
| 14            | 1             | -1.756427               | 0.968799  | 0.643705  |
| 15            | 1             | -1.815119               | 0.811476  | -1.109265 |
| 16            | 6             | -0.946916               | 2.665856  | -0.430145 |
| 17            | 1             | -1.091021               | 3.387234  | 0.383866  |
| 18            | 1             | -1.139341               | 3.203501  | -1.366211 |
| 19            | 6             | 0.477632                | 2.194532  | -0.454005 |
| 20            | 6             | 1.292949                | 2.052680  | -1.547478 |
| 21            | 16            | 1.279667                | 1.699332  | 0.993197  |
| 22            | 6             | 2.575975                | 1.533943  | -1.217701 |
| 23            | 1             | 0.983610                | 2.321882  | -2.551378 |
| 24            | 6             | 2.713576                | 1.285876  | 0.123643  |
| 25            | 1             | 3.368201                | 1.386159  | -1.943719 |
| 26            | 6             | 3.874528                | 0.772410  | 0.893939  |
| 27            | 8             | 3.941506                | 0.884433  | 2.110641  |
| 28            | 7             | 4.861636                | 0.185513  | 0.160280  |
| 29            | 6             | 6.016762                | -0.392354 | 0.825306  |
| 30            | 1             | 5.720079                | -1.281100 | 1.400069  |
| 31            | 1             | 6.384429                | 0.341715  | 1.548897  |

|    |   |            |           |           |
|----|---|------------|-----------|-----------|
| 32 | 6 | 7.093107   | -0.744609 | -0.191569 |
| 33 | 1 | 6.705482   | -1.463882 | -0.922929 |
| 34 | 1 | 7.381646   | 0.150165  | -0.753327 |
| 35 | 6 | 8.318760   | -1.339630 | 0.487884  |
| 36 | 1 | 8.063032   | -2.236369 | 1.065603  |
| 37 | 1 | 8.763899   | -0.637875 | 1.202694  |
| 38 | 6 | 9.386633   | -1.729652 | -0.501610 |
| 39 | 8 | 9.294916   | -1.655342 | -1.702403 |
| 40 | 8 | 10.493851  | -2.190495 | 0.113180  |
| 41 | 1 | 11.132780  | -2.426963 | -0.576816 |
| 42 | 7 | -5.758955  | 1.216059  | -0.110241 |
| 43 | 7 | -7.833403  | 0.008984  | 0.050652  |
| 44 | 7 | -7.505718  | -2.324370 | 0.056771  |
| 45 | 7 | -9.657096  | -1.423650 | 0.115489  |
| 46 | 1 | -9.985591  | -2.226141 | 0.633760  |
| 47 | 1 | -10.181420 | -0.578028 | 0.293201  |
| 48 | 1 | 4.663081   | -0.091625 | -0.789998 |
| 49 | 8 | -5.496582  | -3.399489 | -0.054797 |

4 (lacking S–lone pair interaction):

Charge = 0 Multiplicity = 1

HF = -1671.0062305 hartrees (-1048573.11970105 kcal/mol)

Imaginary Frequencies: none found

Zero-point correction = 0.392774 (Hartree/Particle)

Temperature 298.150 Kelvin. Pressure 1.00000 Atm.

Sum of electronic and thermal Free Energies =

-1670.677084 hartrees (-1048366.57698084 kcal/mol)

Coordinates (from last standard orientation):

| Center Number | Atomic Number | Coordinates (Angstroms) |           |           |
|---------------|---------------|-------------------------|-----------|-----------|
|               |               | X                       | Y         | Z         |
| 1             | 6             | 4.952170                | 0.934623  | 0.370601  |
| 2             | 6             | 5.886729                | 0.295414  | -0.439416 |
| 3             | 6             | 7.557490                | 1.698238  | -0.005673 |
| 4             | 6             | 5.361502                | 2.115025  | 1.077539  |
| 5             | 6             | 3.724836                | 0.207382  | 0.273078  |
| 6             | 6             | 3.948258                | -0.840268 | -0.582069 |
| 7             | 1             | 7.044401                | 3.287639  | 1.220052  |
| 8             | 1             | 2.800647                | 0.442393  | 0.779780  |
| 9             | 1             | 5.723566                | -1.414134 | -1.644509 |
| 10            | 6             | 3.044306                | -1.927426 | -1.073012 |
| 11            | 1             | 2.952043                | -1.863969 | -2.166841 |
| 12            | 1             | 3.494485                | -2.906680 | -0.856127 |
| 13            | 6             | 1.653536                | -1.863467 | -0.446847 |
| 14            | 1             | 1.731465                | -1.950120 | 0.643127  |
| 15            | 1             | 1.204444                | -0.884941 | -0.655817 |
| 16            | 6             | 0.738314                | -2.972785 | -0.978358 |
| 17            | 1             | 1.195785                | -3.951408 | -0.790619 |
| 18            | 1             | 0.639293                | -2.874366 | -2.067154 |
| 19            | 6             | -0.618105               | -2.978840 | -0.338442 |
| 20            | 6             | -1.172530               | -3.939770 | 0.463877  |
| 21            | 16            | -1.714418               | -1.654966 | -0.557653 |

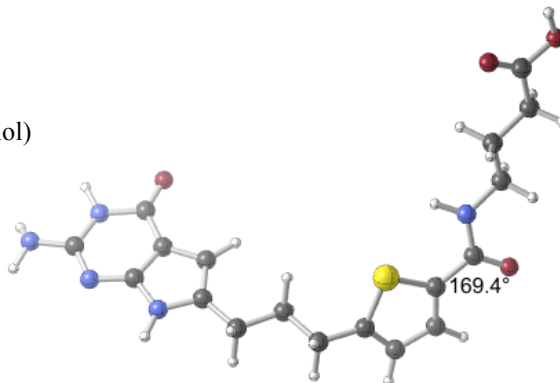

|    |   |           |           |           |
|----|---|-----------|-----------|-----------|
| 22 | 6 | -2.484005 | -3.612641 | 0.912409  |
| 23 | 1 | -0.650423 | -4.854707 | 0.720586  |
| 24 | 6 | -2.914847 | -2.402010 | 0.448326  |
| 25 | 1 | -3.104914 | -4.226748 | 1.553528  |
| 26 | 6 | -4.238175 | -1.808009 | 0.776625  |
| 27 | 8 | -5.103626 | -2.471871 | 1.329929  |
| 28 | 7 | -4.432825 | -0.506229 | 0.421378  |
| 29 | 6 | -5.675707 | 0.168951  | 0.750705  |
| 30 | 1 | -5.686705 | 0.453009  | 1.812790  |
| 31 | 1 | -6.483165 | -0.554987 | 0.608177  |
| 32 | 6 | -5.874792 | 1.393954  | -0.131641 |
| 33 | 1 | -5.042694 | 2.097056  | -0.005670 |
| 34 | 1 | -5.876387 | 1.095267  | -1.185033 |
| 35 | 6 | -7.179596 | 2.102602  | 0.205117  |
| 36 | 1 | -7.210366 | 2.409777  | 1.257822  |
| 37 | 1 | -8.044675 | 1.445422  | 0.057967  |
| 38 | 6 | -7.393332 | 3.338520  | -0.630559 |
| 39 | 8 | -6.617485 | 3.785861  | -1.438957 |
| 40 | 8 | -8.582657 | 3.917351  | -0.370399 |
| 41 | 1 | -8.652788 | 4.703678  | -0.933529 |
| 42 | 7 | 5.270452  | -0.775090 | -1.008520 |
| 43 | 7 | 7.193092  | 0.625608  | -0.646602 |
| 44 | 7 | 6.724602  | 2.418865  | 0.809039  |
| 45 | 7 | 8.829850  | 2.199160  | -0.171431 |
| 46 | 1 | 9.256064  | 2.647833  | 0.626928  |
| 47 | 1 | 9.440657  | 1.555303  | -0.655007 |
| 48 | 1 | -3.642599 | 0.057109  | 0.139106  |
| 49 | 8 | 4.722525  | 2.840393  | 1.819710  |

---

### III. Full Gaussian Reference

S1. Gaussian 09, Revision D.01, Frisch, M. J.; Trucks, G. W.; Schlegel, H. B.; Scuseria, G. E.; Robb, M. A.; Cheeseman, J. R.; Scalmani, G.; Barone, V.; Mennucci, B.; Petersson, G. A.; Nakatsuji, H.; Caricato, M.; Li, X.; Hratchian, H. P.; Izmaylov, A. F.; Bloino, J.; Zheng, G.; Sonnenberg, J. L.; Hada, M.; Ehara, M.; Toyota, K.; Fukuda, R.; Hasegawa, J.; Ishida, M.; Nakajima, T.; Honda, Y.; Kitao, O.; Nakai, H.; Vreven, T.; Montgomery, Jr., J. A.; Peralta, J. E.; Ogliaro, F.; Bearpark, M.; Heyd, J. J.; Brothers, E.; Kudin, K. N.; Staroverov, V. N.; Kobayashi, R.; Normand, J.; Raghavachari, K.; Rendell, A.; Burant, J. C.; Iyengar, S. S.; Tomasi, J.; Cossi, M.; Rega, N.; Millam, N. J.; Klene, M.; Knox, J. E.; Cross, J. B.; Bakken, V.; Adamo, C.; Jaramillo, J.; Gomperts, R.; Stratmann, R. E.; Yazyev, O.; Austin, A. J.; Cammi, R.; Pomelli, C.; Ochterski, J. W.; Martin, R. L.; Morokuma, K.; Zakrzewski, V. G.; Voth, G. A.; Salvador, P.; Dannenberg, J. J.; Dapprich, S.; Daniels, A. D.; Farkas, Ö.; Foresman, J. B.; Ortiz, J. V.; Cioslowski, J.; Fox, D. J. Gaussian, Inc., Wallingford CT, **2009**.
